# Supplementary material for: Inhibitory Effects of Extracellular Vesicles from iPS-Cell-Derived Mesenchymal Stem Cells on the Onset of Sialadenitis in Sjögren’s Syndrome Are Mediated by Immunomodulatory Splenocytes and Improved by Inhibiting miR-125b
Source: MDPI journal article supplement (doi:10.3390/ijms24065258), 2023-03-09
Supplement: s1 [file s1]

## Supplementary information

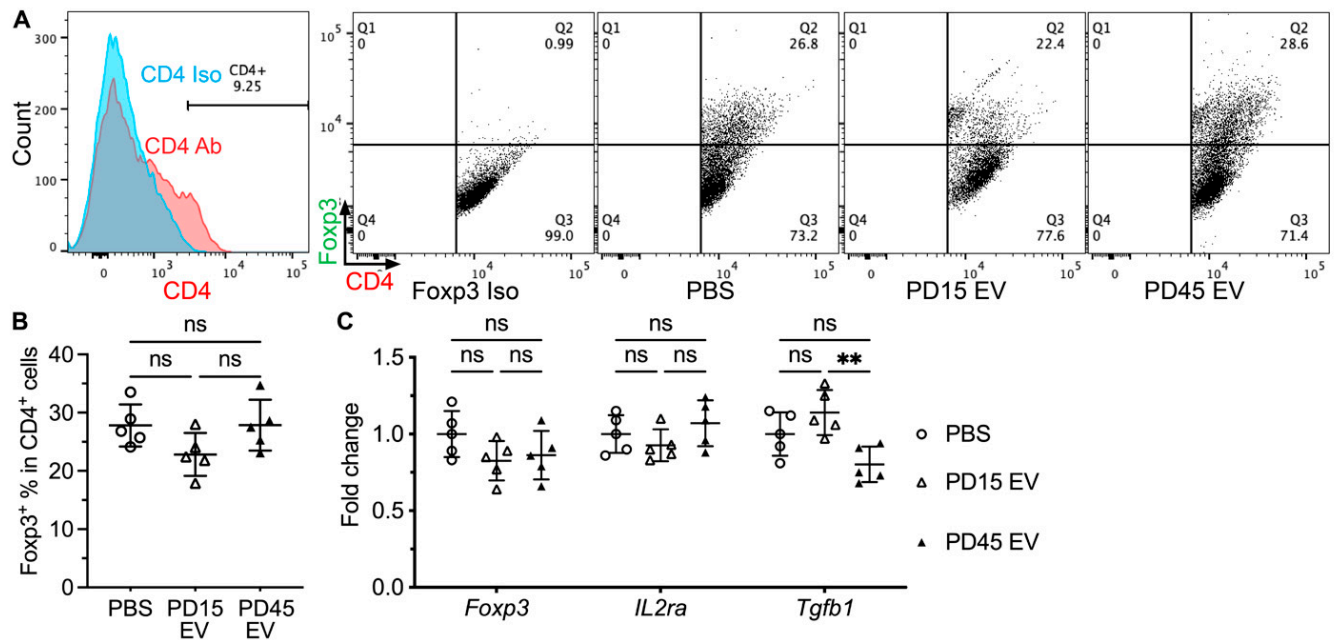

**Figure S1. Effects iEVs on splenic Treg cells.**

Four-month-old female NOD.B10.H2<sup>b</sup> mice were IV injected with PBS, PD15 iEVs, or PD45 iEVs twice a week for two weeks. Splenocytes were collected at two weeks after last injection.

**A,B:** Percentages of Foxp3<sup>+</sup> cells in CD4<sup>+</sup> splenocytes were examined with flow cytometry.

**C:** The mRNA levels of markers for Treg cells in spleen were examined with qRT-PCR.

N = 5. ns: not significant. \*\*: p < 0.01.
